# Supplementary material for: Plant Health and Rhizosphere Microbiome: Effects of the Bionematicide Aphanocladium album in Tomato Plants Infested by Meloidogyne javanica
Source: PubMed Central journal article supplement (PMC7761678; doi:10.3390/microorganisms8121922), 2020-12-03
Supplement: microorganisms-08-01922-s001.pdf [file microorganisms-08-01922-s001.pdf]

# Plant health and rhizosphere microbiome: effects of the bio-nematicide *Aphanocladium album* in tomato plants infested by *Meloidogyne javanica*

Claudia Leoni<sup>1,a</sup>, Elisabetta Piancone<sup>2,a</sup>, Nicola Sasanelli<sup>3</sup>, Giovanni Luigi Bruno<sup>4</sup>, Caterina Manzari<sup>1</sup>, Graziano Pesole<sup>1,2,5</sup>, Luigi R. Ceci<sup>1,\*</sup> and Mariateresa Volpicella<sup>1,2,5,\*</sup>

- <sup>1</sup> Institute of Biomembranes, Bioenergetics and Molecular Biotechnologies, CNR, Via Amendola 165/A, 70126 Bari, Italy; c.leoni@ibiom.cnr.it C.L.; e.piancone@ibiom.cnr.it (E.P.); c.manzari@ibiom.cnr.it (C.M.)
  - <sup>2</sup> Department of Biosciences, Biotechnologies and Biopharmaceutics, University of Bari Aldo Moro, Via Amendola 165/A, 70126 Bari, Italy; graziano.pesole@uniba.it (G.P.)
  - <sup>3</sup> Institute for Sustainable Plant Protection, CNR, Via G. Amendola 122/D, 70126 Bari, Italy; nicola.sasanelli@ips.cnr.it (N.S.)
  - <sup>4</sup> Department of Soil, Plant and Food Sciences, University of Bari Aldo Moro, Via Amendola 165/A, 70126 Bari, Italy; giovanniluigi.bruno@uniba.it (G.L.B.)
  - <sup>5</sup> Consorzio Interuniversitario Biotecnologie, Località Padriciano, 99, 34149 Area di Ricerca, Trieste, Italy.
- \* Correspondence: mariateresa.volpicella@uniba.it (M.V.); l.ceci@ibiom.cnr.it (L.R.C.)
- <sup>a</sup> These authors have contributed equally to this work.

## List of material:

**Table S1.:** Denoising results for the different treatments.

**Table S2.:** Relative abundances of bacterial genera obtained by metabarcoding analysis.

**Figure S1:** Rarefaction curves of 16S rRNA ASVs for the treatment replicates.

**Figure S2.:** Summary of pairwise Dunn tests.

**Table S1:** Denoising results for the different treatments.

Biological replicates are indicated in the sample-id column as 1 for Control thesis, as 2 for N thesis, as 3 for N+MX95, as 4 for MX95 and as 5 for N+Ter.

| Sample-id | Input    | Filtered | Percentage of input passed filter | Denoised | Merged   | Percentage of input merged | Non-chimeric | Percentage of input non-chimeric |
|-----------|----------|----------|-----------------------------------|----------|----------|----------------------------|--------------|----------------------------------|
| 1-1A      | 46040    | 39979    | 86.84                             | 39222    | 36064    | 78.33                      | 35354        | 76.79                            |
| 1-1B      | 57801    | 51910    | 89.81                             | 51187    | 48797    | 84.42                      | 47701        | 82.53                            |
| 1-1C      | 60760    | 54078    | 89                                | 52945    | 49153    | 80.9                       | 48417        | 79.69                            |
| 1-2A      | 62936    | 56031    | 89.03                             | 54982    | 51317    | 81.54                      | 50382        | 80.05                            |
| 1-2B      | 58446    | 51521    | 88.15                             | 50678    | 47343    | 81                         | 44795        | 76.64                            |
| 2-1A      | 78218    | 67336    | 86.09                             | 66352    | 62249    | 79.58                      | 61241        | 78.3                             |
| 2-1B      | 67927    | 60301    | 88.77                             | 59431    | 56404    | 83.04                      | 55737        | 82.05                            |
| 2-1C      | 65274    | 57338    | 87.84                             | 56365    | 53089    | 81.33                      | 51569        | 79                               |
| 2-2A      | 76139    | 66499    | 87.34                             | 65482    | 61625    | 80.94                      | 61075        | 80.22                            |
| 2-2B      | 81391    | 70918    | 87.13                             | 69982    | 66104    | 81.22                      | 64392        | 79.11                            |
| 3-1A      | 77833    | 68532    | 88.05                             | 67589    | 63797    | 81.97                      | 62448        | 80.23                            |
| 3-1B      | 59237    | 52270    | 88.24                             | 51189    | 46858    | 79.1                       | 45988        | 77.63                            |
| 3-1C      | 59483    | 50255    | 84.49                             | 49207    | 44416    | 74.67                      | 43705        | 73.47                            |
| 3-2A      | 76806    | 67893    | 88.4                              | 66875    | 62078    | 80.82                      | 60566        | 78.86                            |
| 3-2B      | 62206    | 55460    | 89.16                             | 54390    | 50153    | 80.62                      | 49224        | 79.13                            |
| 4-1A      | 57175    | 50491    | 88.31                             | 49469    | 45393    | 79.39                      | 44626        | 78.05                            |
| 4-1B      | 74269    | 66644    | 89.73                             | 65535    | 61042    | 82.19                      | 60323        | 81.22                            |
| 4-1C      | 82941    | 74029    | 89.26                             | 73009    | 68610    | 82.72                      | 67174        | 80.99                            |
| 4-2A      | 77642    | 69605    | 89.65                             | 68431    | 64134    | 82.6                       | 63147        | 81.33                            |
| 4-2B      | 72595    | 64742    | 89.18                             | 63800    | 59129    | 81.45                      | 56860        | 78.32                            |
| 5-1A      | 72939    | 63600    | 87.2                              | 62336    | 57731    | 79.15                      | 56696        | 77.73                            |
| 5-1B      | 72085    | 63835    | 88.56                             | 62950    | 59479    | 82.51                      | 58165        | 80.69                            |
| 5-1C      | 73715    | 64042    | 86.88                             | 62892    | 57907    | 78.56                      | 56367        | 76.47                            |
| 5-2A      | 78497    | 69366    | 88.37                             | 68612    | 64763    | 82.5                       | 62823        | 80.03                            |
| 5-2B      | 77856    | 68205    | 87.6                              | 67055    | 63313    | 81.32                      | 62564        | 80.36                            |
| Mean      | 69208.44 | 60995.2  | 89                                | 59998.6  | 56037.92 | 81                         | 54853.56     | 79                               |
| DS        | 9494,36  | 8432,86  | 1,23                              | 8398,33  | 8196,70  | 1,95                       | 8080,38      | 2,01                             |

**Table S2.** Relative abundances of bacterial genera obtained by metabarcoding analysis. ASVs which could not be resolved at the genus level were reported with the notation g\_undetermined followed by the name of the closest known parental rank.

| Genus                              | Thesis  |       |         |          |       |
|------------------------------------|---------|-------|---------|----------|-------|
|                                    | Control | N     | N + Ter | N + MX95 | MX95  |
| Arthrobacter                       | 11.02   | 11.23 | 10.26   | 4.20     | 4.15  |
| Pseudarthrobacter                  | 5.38    | 5.15  | 5.67    | 8.05     | 6.16  |
| Nocardioides                       | 3.83    | 2.89  | 4.02    | 2.40     | 2.45  |
| Pseudomonas                        | 3.35    | 6.28  | 2.79    | 1.47     | 1.38  |
| Microbacterium                     | 2.83    | 2.61  | 2.16    | 5.02     | 3.50  |
| Ensifer                            | 2.75    | 3.50  | 1.75    | 1.26     | 0.95  |
| Pseudoxanthomonas                  | 2.70    | 3.70  | 1.95    | 1.39     | 1.57  |
| Streptomyces                       | 2.27    | 0.84  | 1.48    | 2.94     | 5.35  |
| Actinoplanes                       | 2.26    | 1.09  | 1.88    | 0.90     | 0.53  |
| Paracoccus                         | 2.22    | 2.95  | 4.84    | 2.26     | 5.90  |
| Sphingomonas                       | 2.13    | 1.93  | 3.17    | 2.85     | 2.80  |
| Saccharimonadales                  | 2.09    | 1.48  | 1.75    | 2.34     | 2.79  |
| g_undetermined_Xanthomonadaceae    | 1.80    | 1.27  | 0.77    | 0.49     | 0.64  |
| Shinella                           | 1.78    | 0.85  | 0.91    | 0.71     | 0.70  |
| Brevundimonas                      | 1.73    | 1.84  | 1.46    | 0.06     | 0.23  |
| Bosea                              | 1.54    | 1.42  | 1.10    | 0.75     | 0.57  |
| g_undetermined Micrococcaceae      | 1.49    | 1.38  | 1.18    | 1.67     | 1.78  |
| Sphingobium                        | 1.35    | 0.80  | 1.15    | 1.47     | 1.28  |
| g_uncultured_Saprospiraceae        | 1.25    | 0.77  | 0.93    | 1.10     | 1.75  |
| Aminobacter                        | 1.23    | 0.58  | 0.49    | 0.42     | 0.28  |
| AKIW781                            | 1.19    | 1.95  | 2.78    | 3.02     | 2.76  |
| Massilia                           | 1.09    | 0.97  | 1.48    | 0.51     | 0.35  |
| Bdellovibrio                       | 1.08    | 1.16  | 0.97    | 0.63     | 0.82  |
| g_undetermined Oxalobacteraceae    | 1.04    | 0.57  | 0.70    | 0.32     | 0.26  |
| Terrimonas                         | 0.98    | 1.01  | 1.03    | 2.34     | 1.83  |
| g_uncultured_Blastocatellaceae     | 0.91    | 0.94  | 1.19    | 0.89     | 1.01  |
| Devosia                            | 0.87    | 0.75  | 1.01    | 0.74     | 0.54  |
| g_undetermined Sphingomonadaceae   | 0.85    | 0.66  | 1.10    | 1.27     | 1.31  |
| Cupriavidus                        | 0.80    | 0.99  | 0.52    | 1.12     | 0.37  |
| Lysobacter                         | 0.76    | 1.14  | 0.65    | 0.13     | 0.28  |
| g_undetermined Comamonadaceae      | 0.50    | 0.86  | 0.81    | 1.47     | 1.05  |
| g_undetermined Chitinophagaceae    | 0.43    | 0.64  | 0.78    | 1.62     | 1.82  |
| g_undetermined Sphingobacteriaceae | 0.39    | 1.83  | 0.83    | 0.14     | 0.17  |
| Rubellimicrobium                   | 0.29    | 0.13  | 0.61    | 2.36     | 1.93  |
| Microvirga                         | 0.26    | 0.18  | 0.31    | 1.77     | 1.73  |
| Azohydromonas                      | 0.24    | 0.43  | 0.76    | 1.18     | 1.12  |
| LWQ8                               | 0.22    | 0.87  | 1.20    | 1.29     | 1.11  |
| Skermanella                        | 0.09    | 0.06  | 0.08    | 1.00     | 0.98  |
| Thauera                            | 0.03    | 0.08  | 0.19    | 2.46     | 1.82  |
| Microlunatus                       | 0.02    | 0.01  | 0.16    | 1.10     | 1.23  |
| Nakamurella                        | 0.00    | 0.01  | 0.01    | 1.43     | 1.17  |
| Others                             | 32.99   | 32.19 | 33.13   | 31.47    | 31.60 |

**Figure S1:** Rarefaction curves of 16S rRNA ASVs for the treatment replicates.

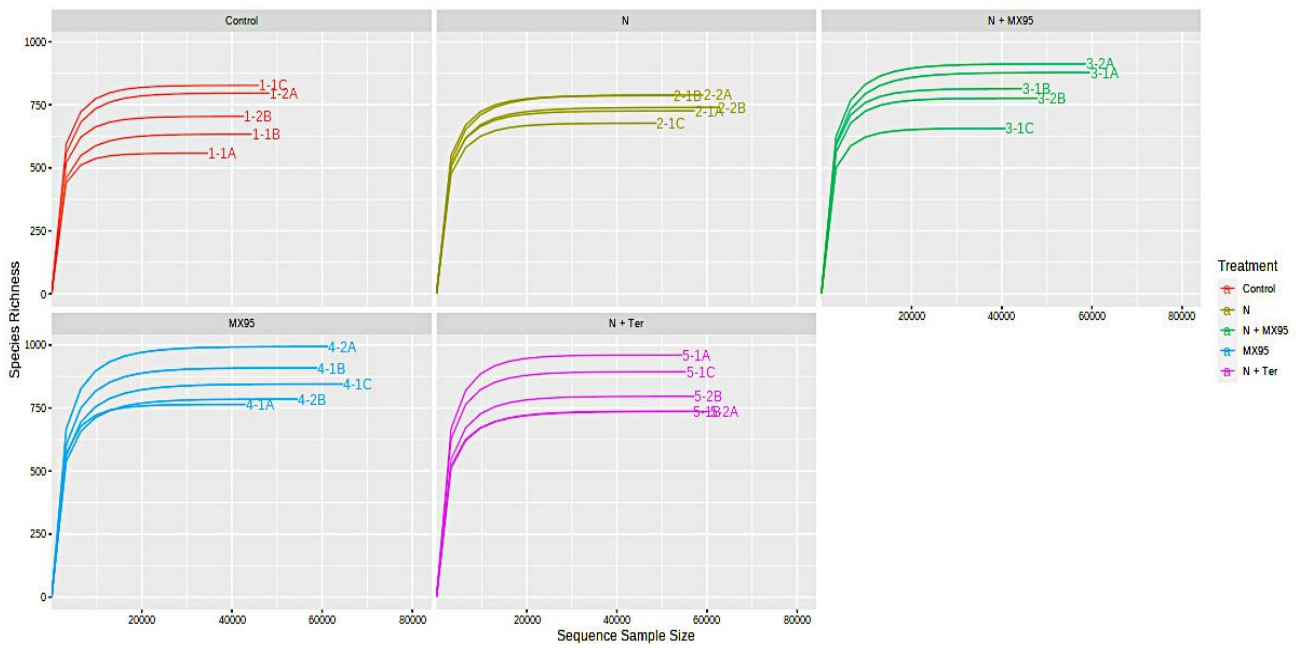

The name reported in the graphics for each curve indicates the biological replicate for each thesis.

**Figure S2:** Summary of pairwise Dunn tests.

Kruskal-wallis chi-squared = 9.881, df = 4, p-value = 0.04

Comparison of x by group  
(Bonferroni)

| Col Mean-<br>Row Mean | Control             | MX95                | N                    | N + MX95           |
|-----------------------|---------------------|---------------------|----------------------|--------------------|
| MX95                  | -1.022469<br>1.0000 |                     |                      |                    |
| N                     | 1.296533<br>0.9740  | 2.459674<br>0.0695  |                      |                    |
| N + MX95              | -1.359779<br>0.8695 | -0.357770<br>1.0000 | -2.817445<br>0.0242* |                    |
| N + Ter               | -0.685160<br>1.0000 | 0.357770<br>1.0000  | -2.101903<br>0.1778  | 0.715541<br>1.0000 |

alpha = 0.05  
Reject Ho if p <= alpha/2
